# Supplementary material for: Transformation of European Ash (Fraxinus excelsior L.) Callus as a Starting Point for Understanding the Molecular Basis of Ash Dieback
Source: MDPI journal article supplement (doi:10.3390/plants10112524), 2021-11-20
Supplement: s1 [file s1]

## **Supporting Information file for:**

Transformation of European ash (*Fraxinus excelsior* L.) callus as a starting point for understanding the molecular basis of ash dieback.

Anna Hebda<sup>1</sup>, Aleksandra Liszka<sup>1</sup>, Piotr Zgłobicki<sup>1</sup>, Katarzyna Nawrot-Chorabik<sup>2</sup>, Jan J. Lyczakowski<sup>1,\*</sup>

<sup>1</sup> Department of Plant Biotechnology, Faculty of Biochemistry, Biophysics and Biotechnology, Jagiellonian University, Gronostajowa 7, 30-387 Krakow, Poland

<sup>2</sup> Department of Forest Ecosystems Protection, Faculty of Forestry, University of Agriculture in Krakow, 29-Listopada Ave. 46, 31-425 Krakow, Poland

\* Corresponding author: Jan J. Lyczakowski (jan.lyczakowski@uj.edu.pl), ORCID: 0000-0002-7694-8629

## **Supporting information figure and table list and short legends:**

Table S1 – Primer sequences and RT-PCR conditions used.

Figure S1 – Selection conditions evaluated for *F. excelsior* callus.

Figure S2 – Further images of GUS activity in callus eight weeks after transformation.

Figure S3 - PCR analysis of *A. tumefaciens* cultures

**Table S1. Primer sequences used in this study.** RT-PCR was performed with 10 uM forward and reverse primer concentrations using PCR-Mix Plus (A&A Biotechnology). For each reaction the initial melting was performed for 2 minutes at 95 °C. PCR was performed for 35 cycles with 30 seconds melting (95 °C), 45 seconds annealing (60 °C) and 90 seconds extension (72 °C). Final extension was performed for 5 minutes.

| Primer name and target           | Primer sequence (5'-3') |
|----------------------------------|-------------------------|
| Fraxinus_excelsior_UBIQUITIN_For | GACCAGCAGCGATTGATCTTT   |
| Fraxinus_excelsior_UBIQUITIN_Rev | GAGGACAAGATGGAGGGTAGAC  |
| GUS_For                          | CAACGAACTGAACTGGCAGA    |
| GUS_Rev                          | AGAGGTTAAAGCCGACAGCA    |

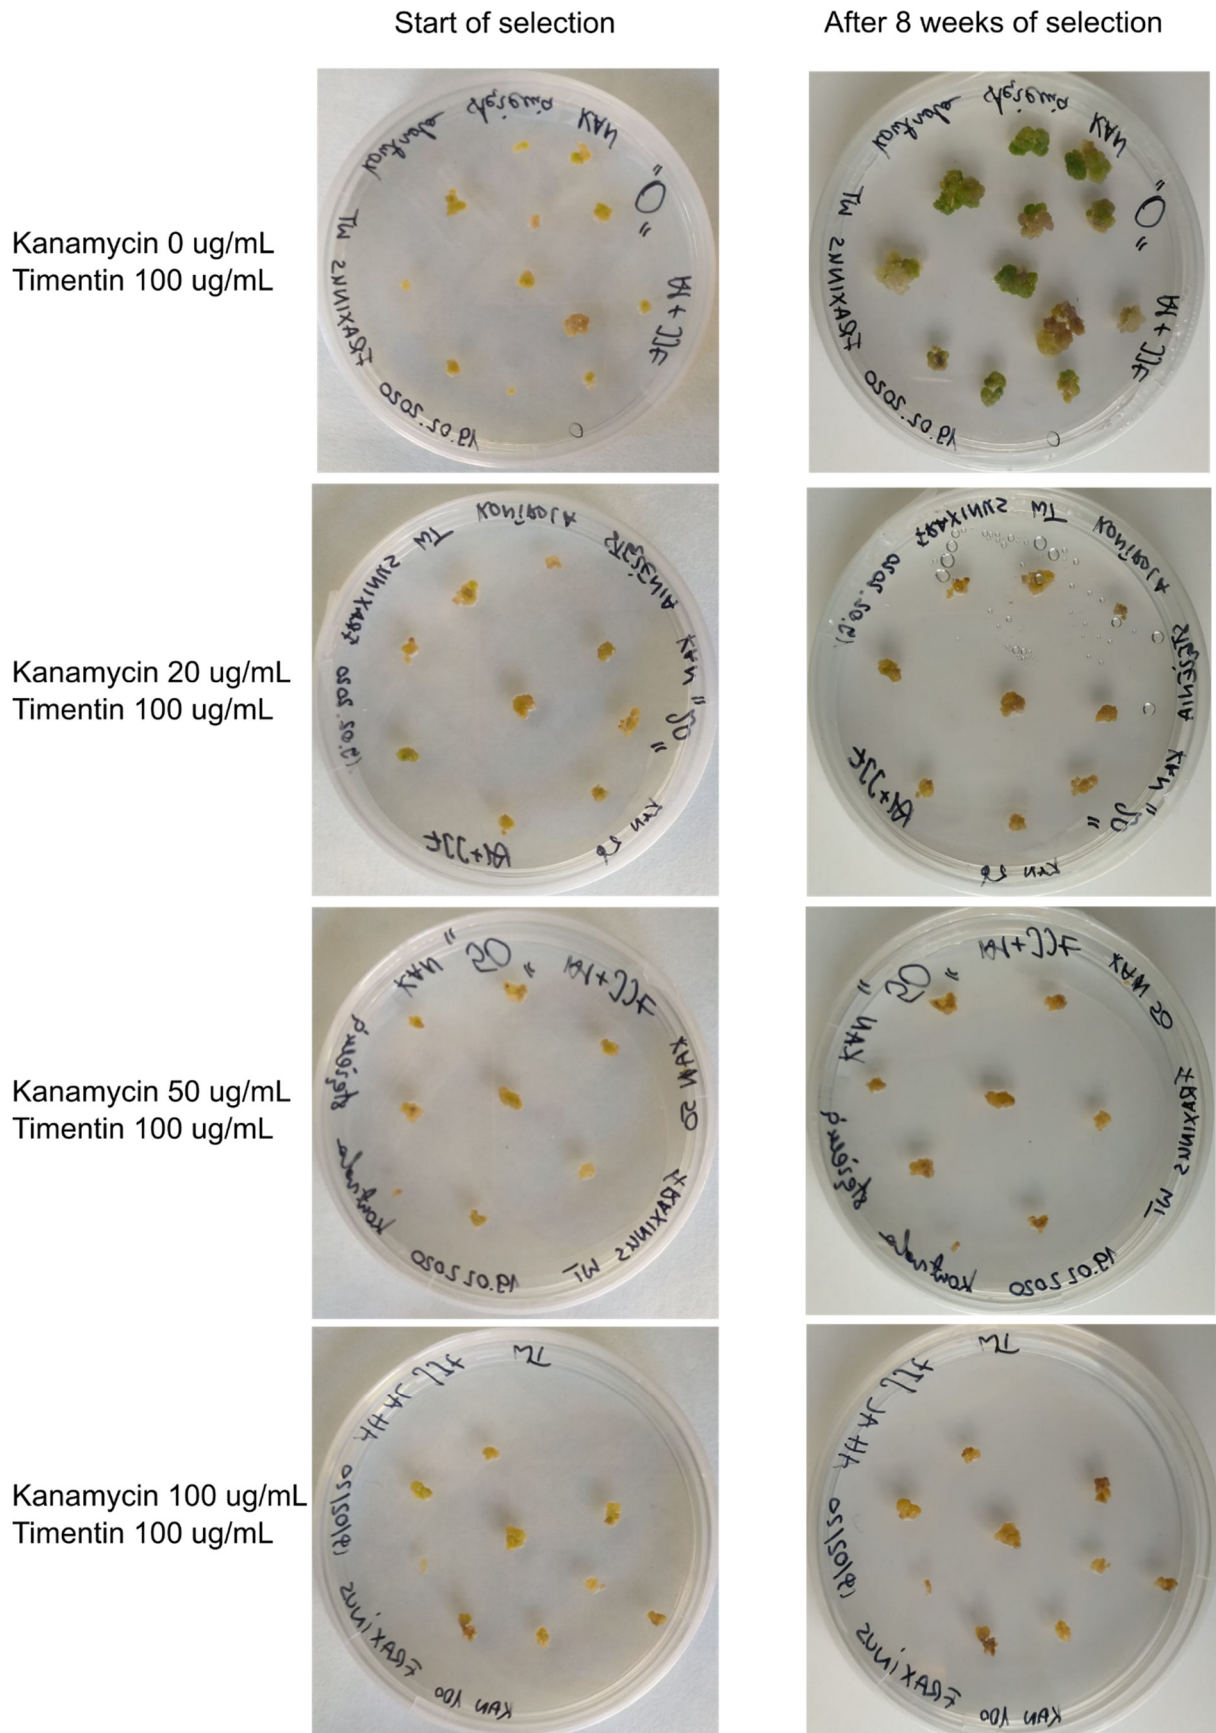

**Figure S1. Selection conditions evaluated for *F. excelsior* callus.** Kanamycin and timentin concentrations are provided for each image.

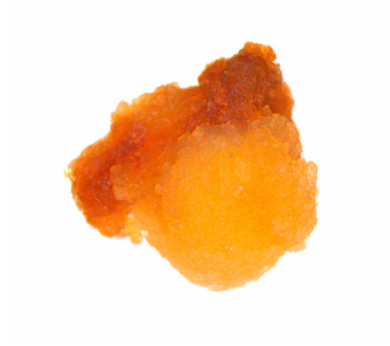

Wild type *F. excelsior* callus

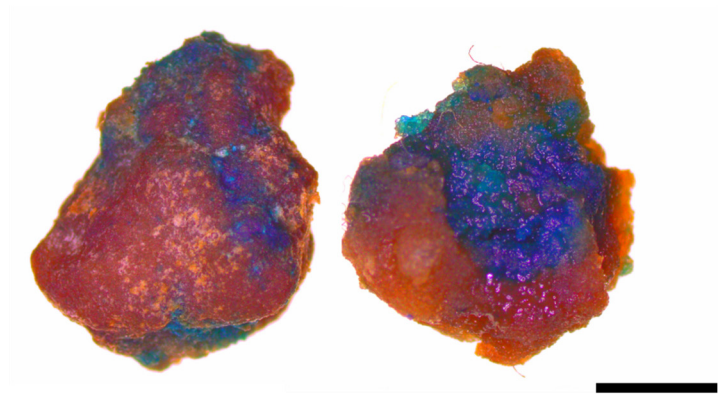

*p35S:GUS F. excelsior* callus

**Figure S2. Further images of GUS activity in callus eight weeks after transformation.**  
Black size bar corresponds to 1 mm.

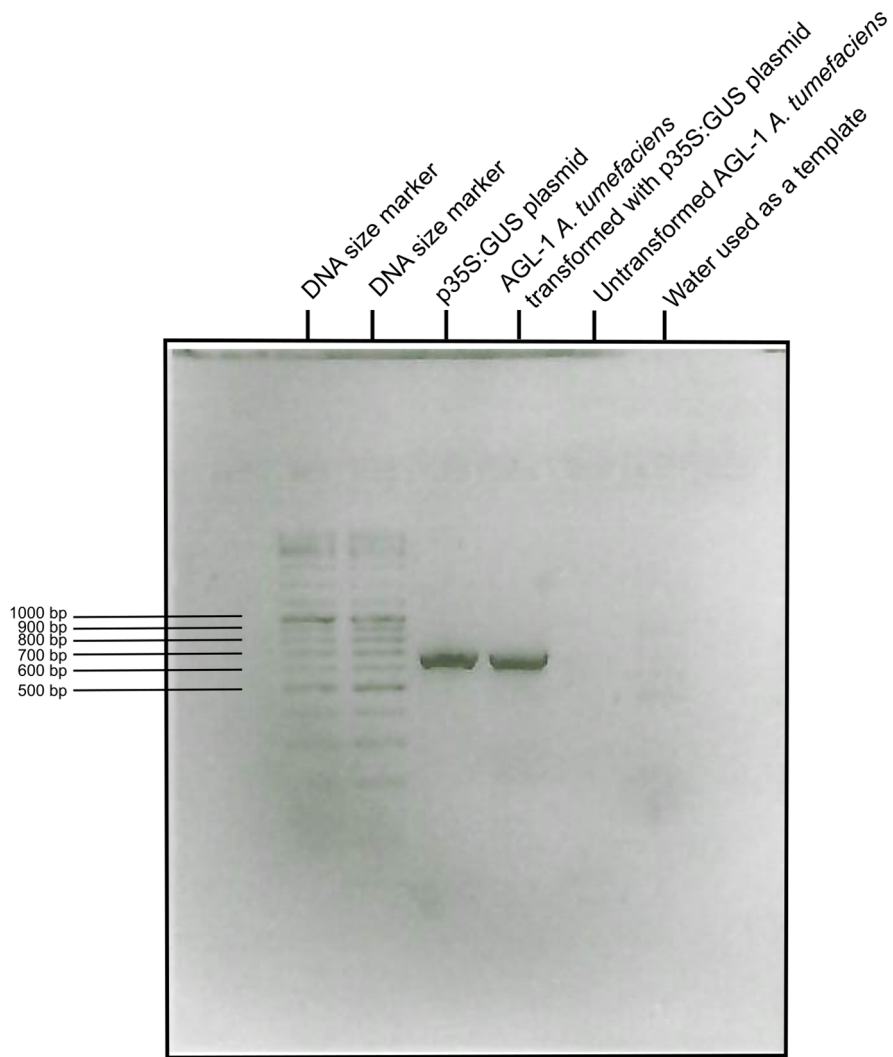

**Figure S3. PCR analysis of *A. tumefaciens* cultures.** Agarose gel electrophoresis of PCR products obtained with *GUS* specific primers (SI Table 1, same conditions used for amplification) using plasmid DNA (0.3 ng), transformed and untransformed AGL-1 *A. tumefaciens* cultures (10  $\mu$ L of full-grown culture preheated to 98°C to release DNA, 1  $\mu$ L of that used in PCR) or water as a template. Product of same size is observed when plasmid and transformed *A. tumefaciens* are used.
